# Supplementary material
Source: PubMed Central journal article supplement (PMC5528955)
Supplement: MOL2-10-224-s002.pdf [file MOL2-10-224-s002.pdf]

# Supplementary Figure 1

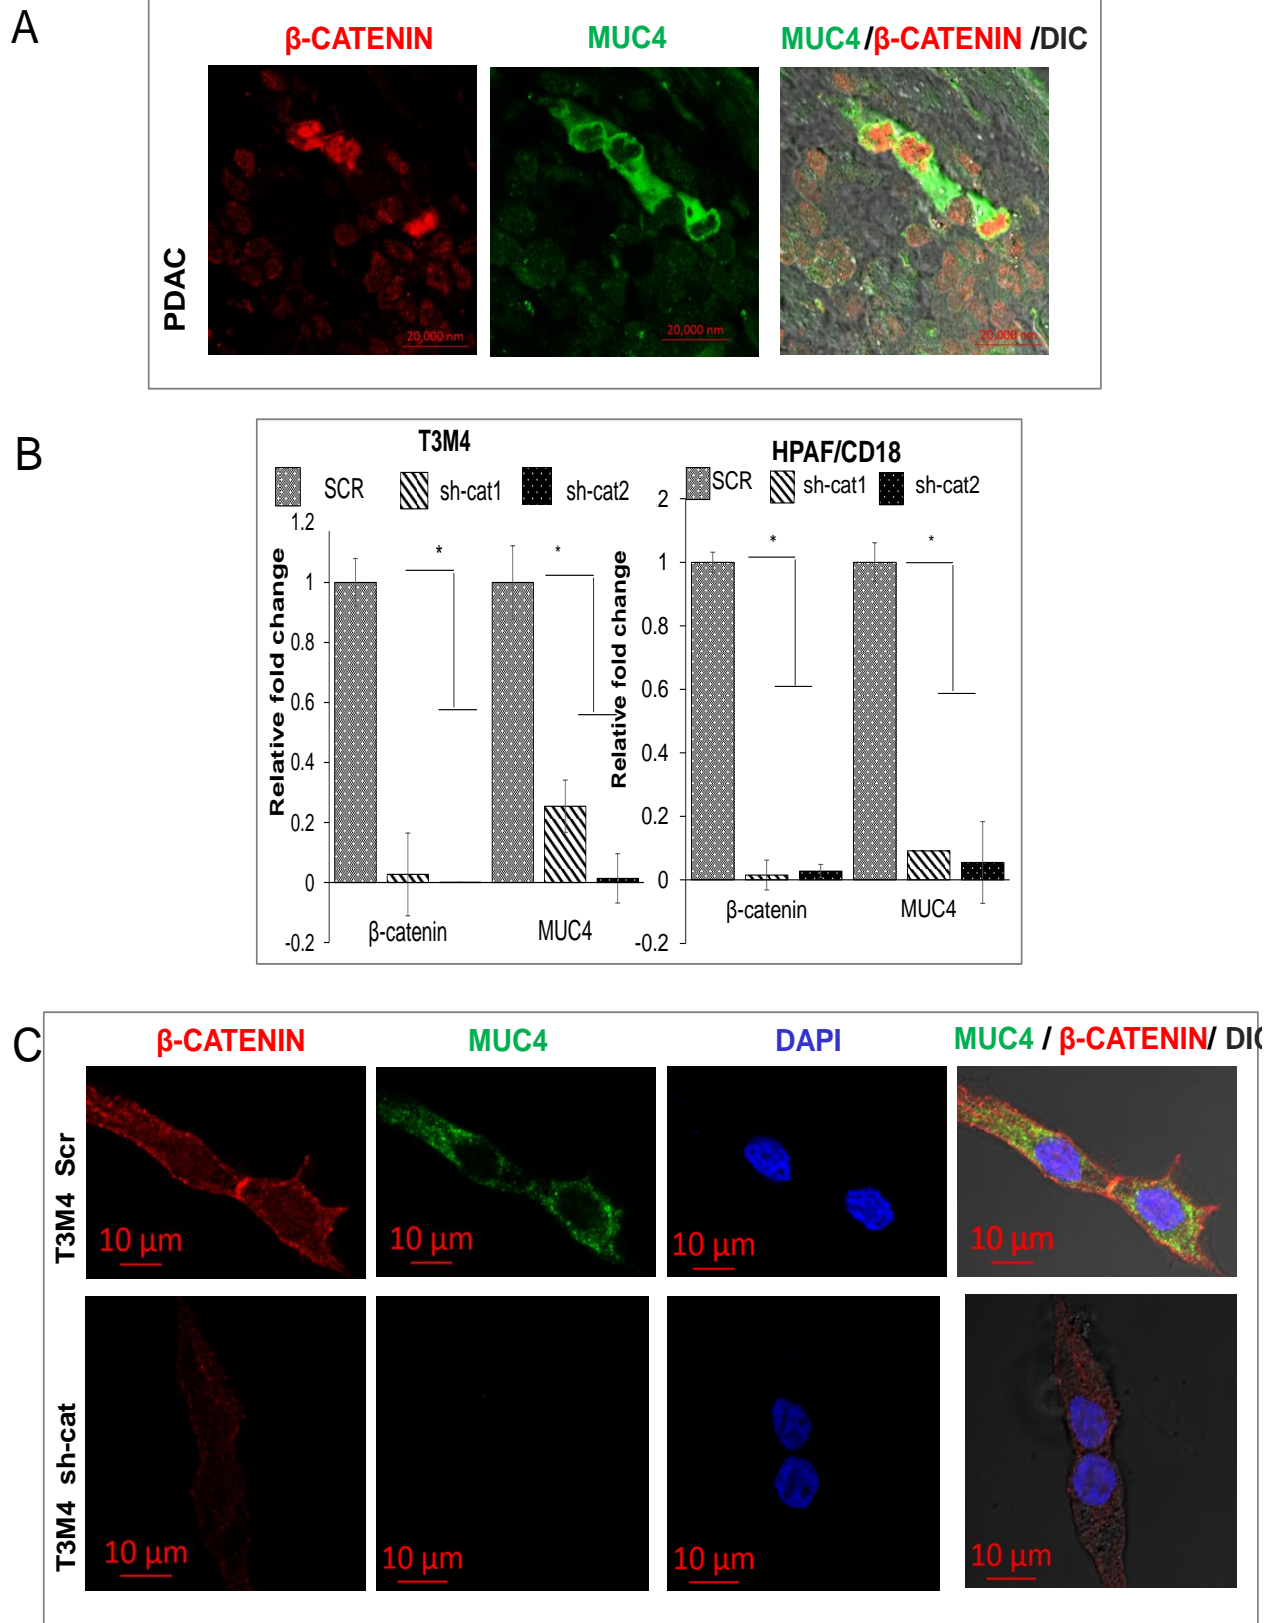

**Supplemental Figure 1.  $\beta$ -catenin KD reduces *MUC4* transcript and protein**(A) Tissue confocal microscopy image of PDAC tissue showing co-localization of nuclear  $\beta$ -catenin (red) and MUC4 (green). (B) The qPCR analysis of  $\beta$ -catenin and MUC4 RNA levels in CDA8/HPAF and T3M4; \* $p < 0.0004$ . (C) Confocal microscopy analysis was used to analyze MUC4 (green) and  $\beta$ -catenin (red) levels in T3M4 Scr and KD cells

## Supplementary Figure 2

A

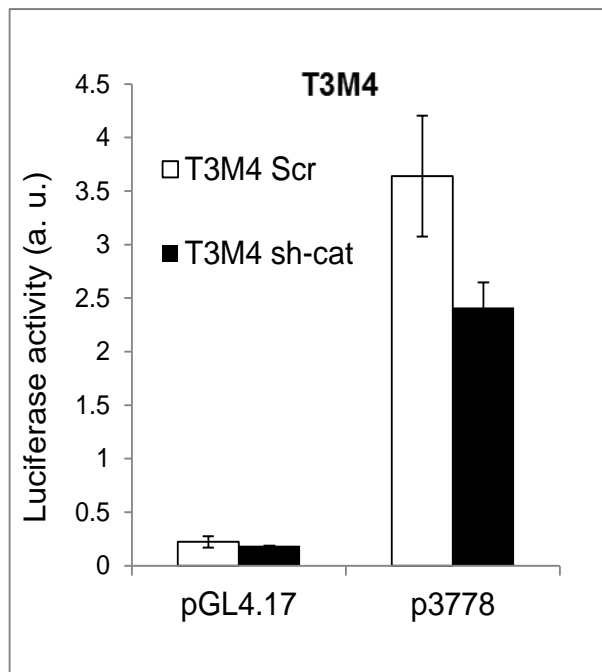

B

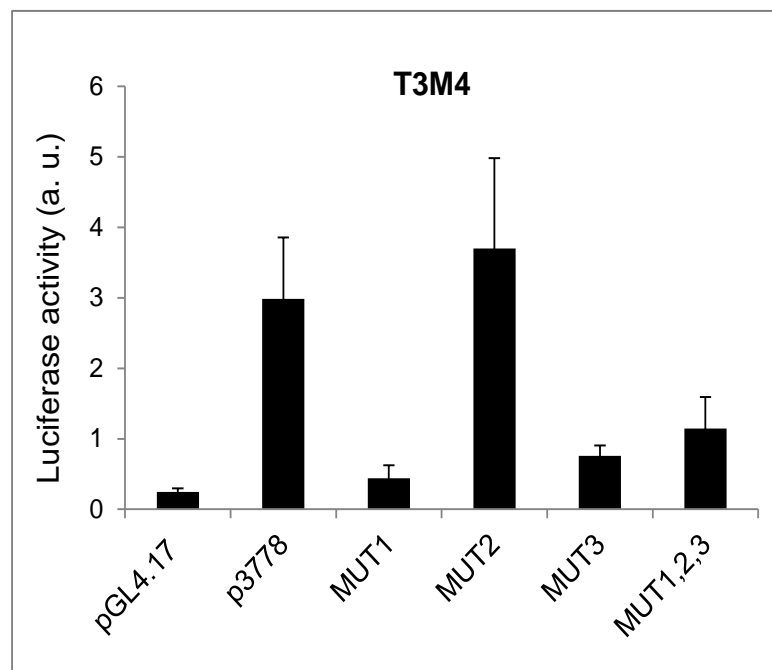

**Supplemental Figure 2. MUC4 promoter luciferase studies with T3M4** (A) *MUC4* promoter luciferase studies with p3778 in T3M4 Scr and KD cells. (B) The p3778 promoter construct with each of the three putative TCF/LEF sites mutated (*i.e.* -2612:MUT1,-3226:MUT2,-3408: MUT3) was transfected into T3M4 cells in the presence of 4ACAT. The pCMV9-Renilla vector was used as an internal transfection control.

# Supplementary Figure 3

A

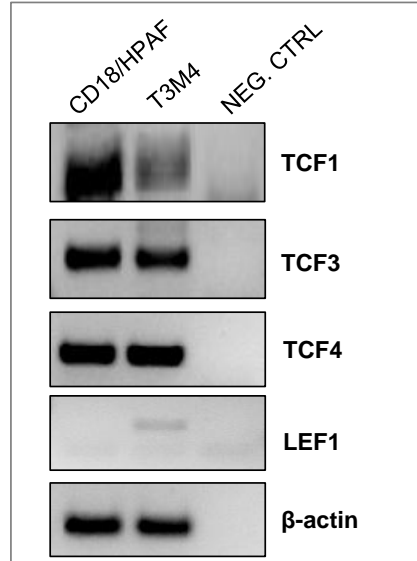

B

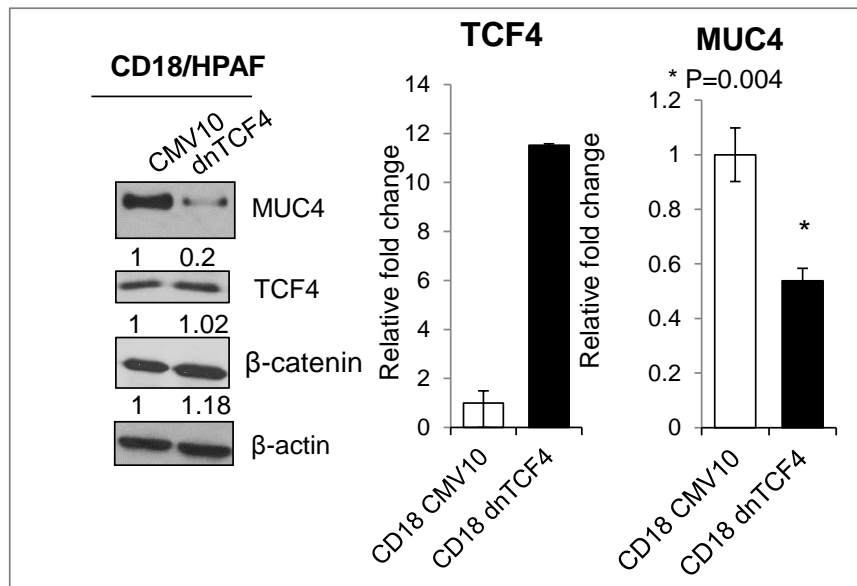

C

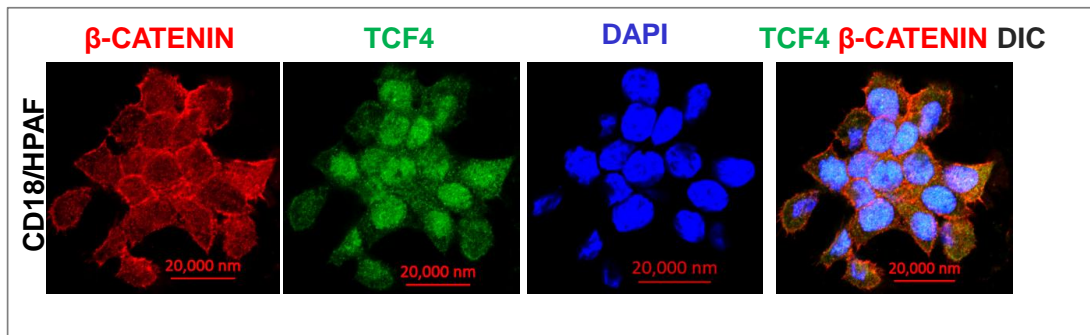

**Supplemental Figure 3.  $\beta$ -catenin partners with TCF4 in the nucleus** (A) CD18/HPAF and T3M4 cells were profiled for the expression of the TCF/LEF group of transcription factors. Figure shows RT-PCR results. (B) Transient transfection with dominant-negative TCF4 (dnTCF4) in CD18/HPAF cells resulted in decreased MUC4 protein and RNA levels compared to the vector control. (C) Confocal microscopy analysis was used to analyze TCF4 (green) and  $\beta$ -catenin (red) levels in CD18/HPAF cells

## Supplementary Figure 4

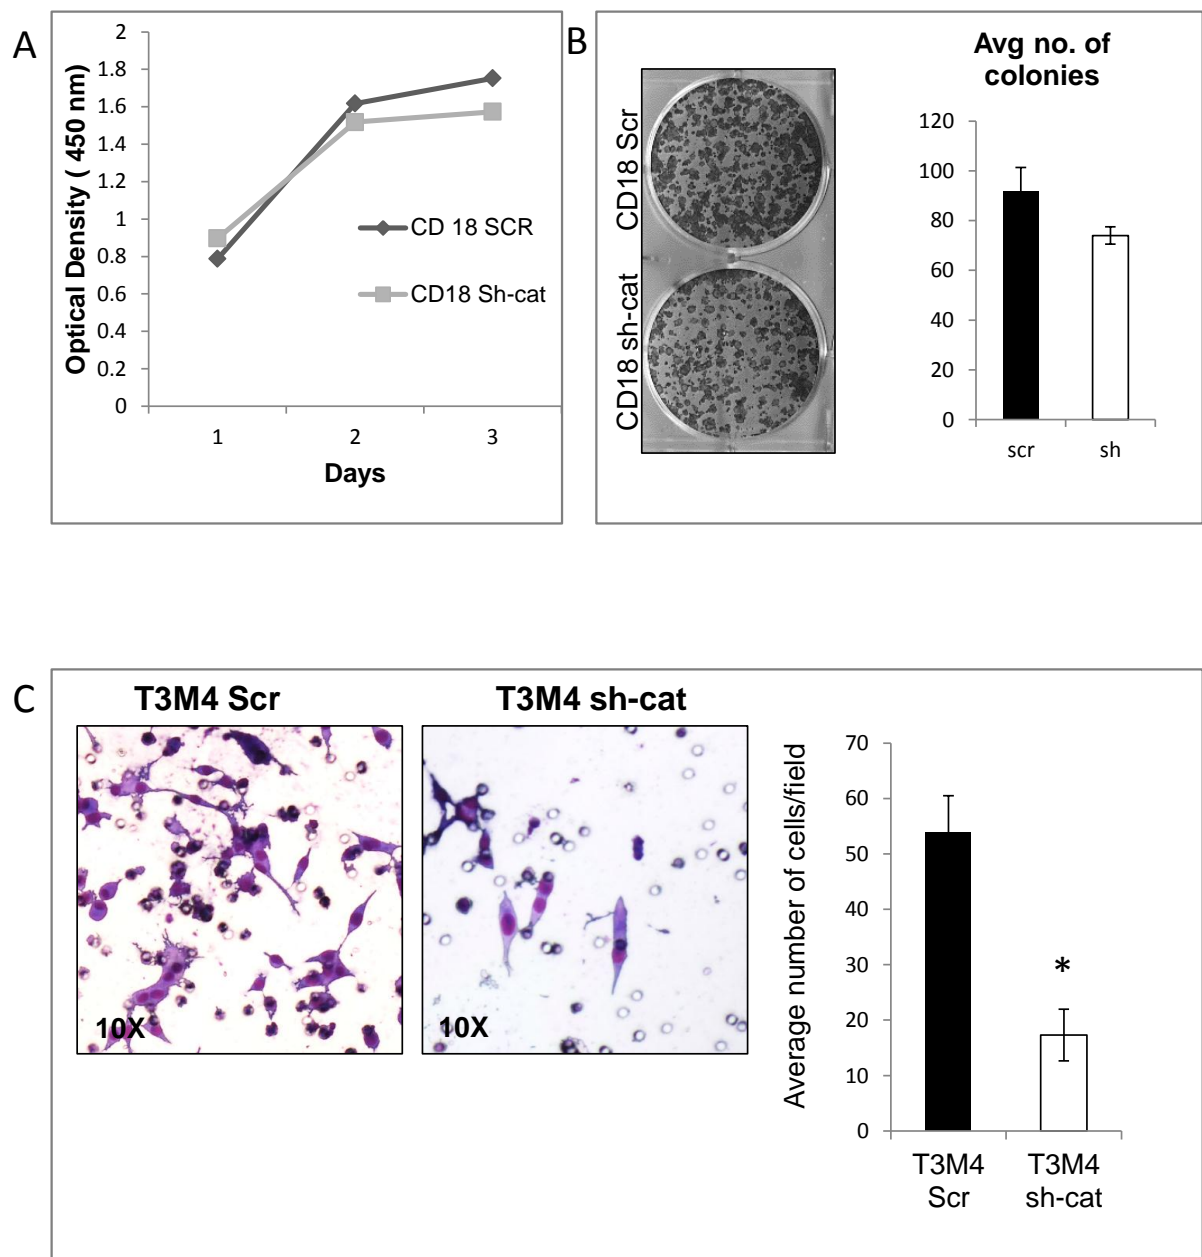

**Supplemental Figure 4. Functional assays with  $\beta$ -catenin KD cells** (A) The cell proliferation assay (WST-1) showed that CD18/HPAF shRNA-cat cells proliferated at a slower rate than Scr control cells. (B) The colony formation assays performed for CD18/HPAF Scr and CD18/HPAF shRNA-cat cells showed that the CD18/HPAF shRNA-cat cells formed fewer colonies than CD18/HPAF Scr cells. (C) Transwell migration assay with T3M4 Scr and KD cells.

## Supplementary Figure 5

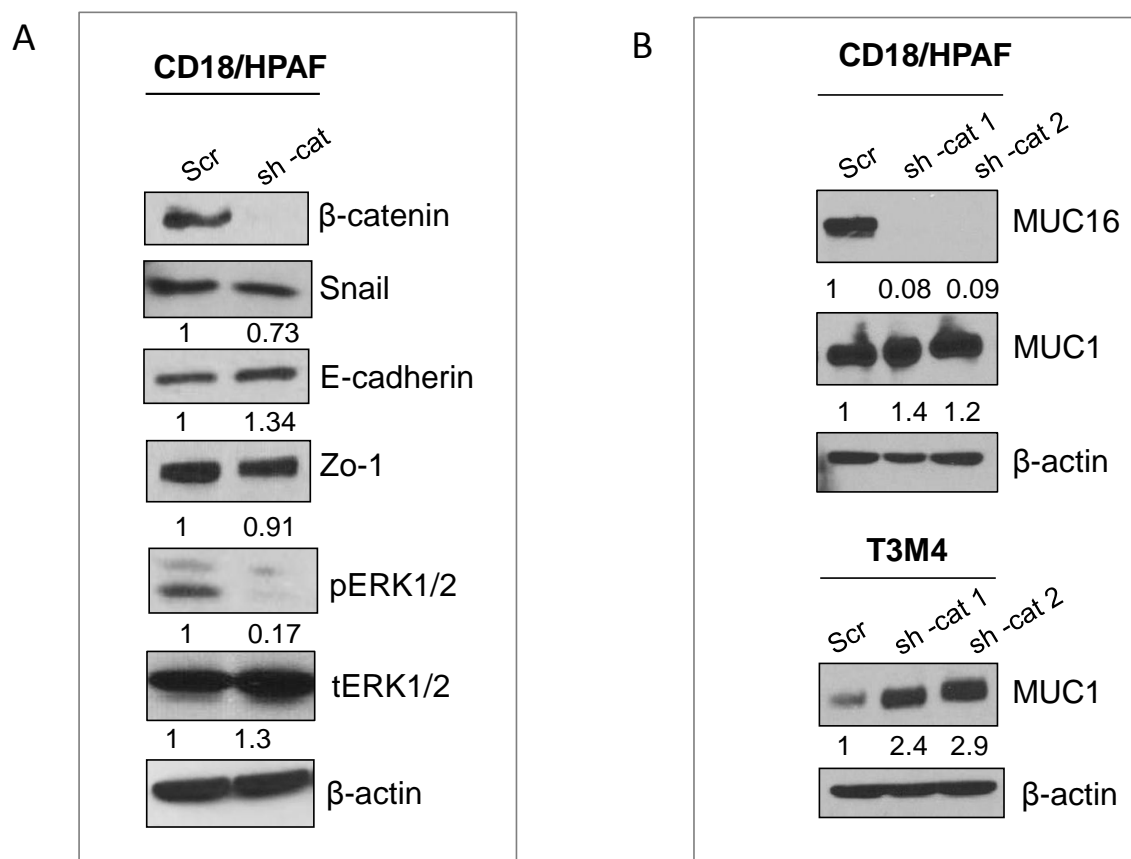

**Supplemental Figure 5. Altered EMT markers in CD18/HPAF and the effect of  $\beta$ -catenin KD on MUC1 and MUC16** (A) Western blot analysis of CD18/HPAF Scr and CD18/HPAF shRNA-cat cells showing levels of  $\beta$ -catenin, Snail, E-cadherin, Zo-1, pERK1/2, total ERK, and  $\beta$ -actin (loading control). (B) Protein expression levels of MUC1 and MUC16 in CD18/HPAF, T3M4 Scr, and KD cells

# Supplementary Figure 6

A

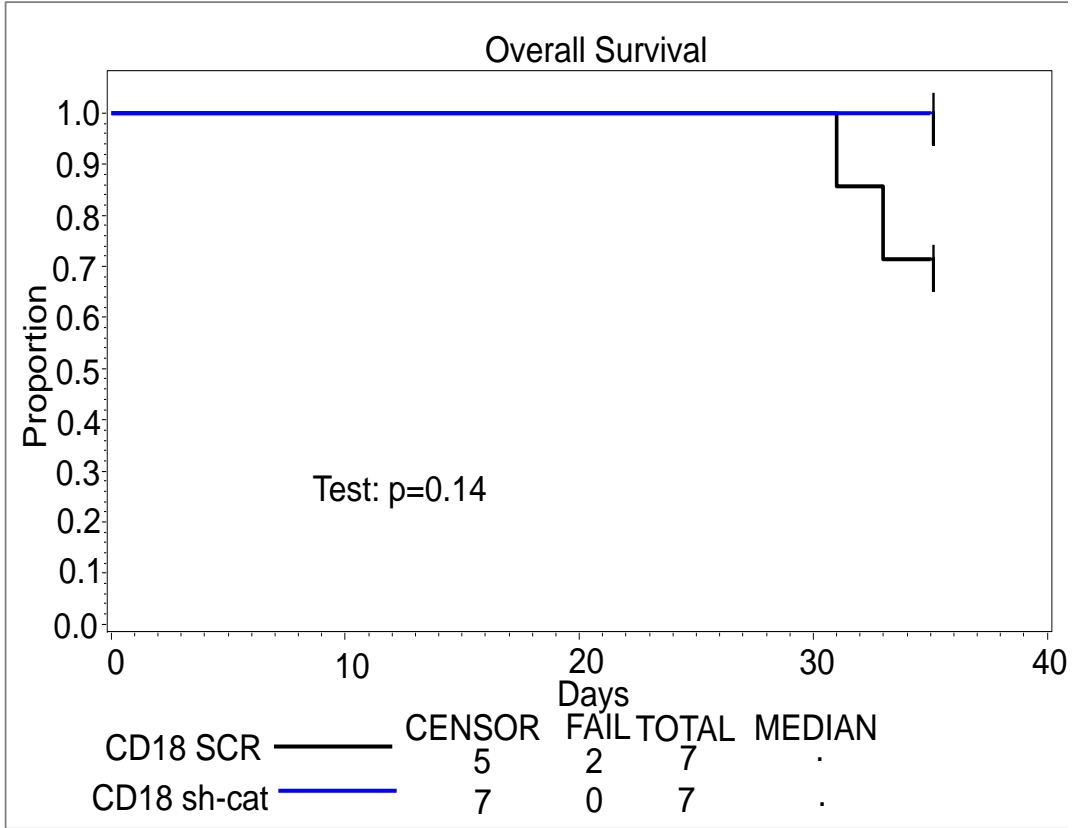

B

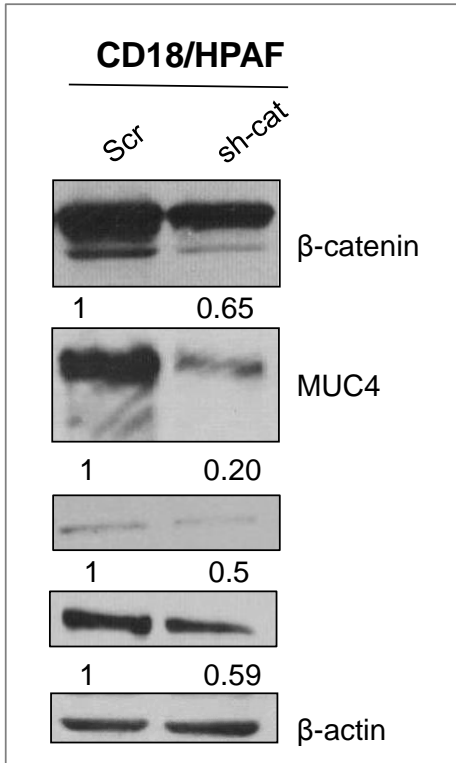

**Supplemental Figure 6. Orthotopic implantation: Kaplan-Meier survival curve and western blot analysis of tumor lysates (A)**

Kaplan-Meier curve showing reduced survival of mice injected with CD18/HPAF Scr control cells compared to KD cells. **(B)** Tumor

lysates from mice orthotopically implanted with CD18/HPAF Scr and KD cells were probed with antibodies for  $\beta$ -catenin, MUC4,

pHER2, and tHER2
